# Supplementary material for: Improved gRNA secondary structures allow editing of target sites resistant to CRISPR-Cas9 cleavage
Source: PubMed Central journal article supplement (PMC8789806; doi:10.1038/s41467-022-28137-7), 2022-01-25
Supplement: 41467_2022_28137_MOESM1_ESM.pdf [file 41467_2022_28137_MOESM1_ESM.pdf]

## Supplementary Information

### Improved gRNA secondary structures allow editing of target sites resistant to CRISPR-Cas9 cleavage

Riesenberg et al.

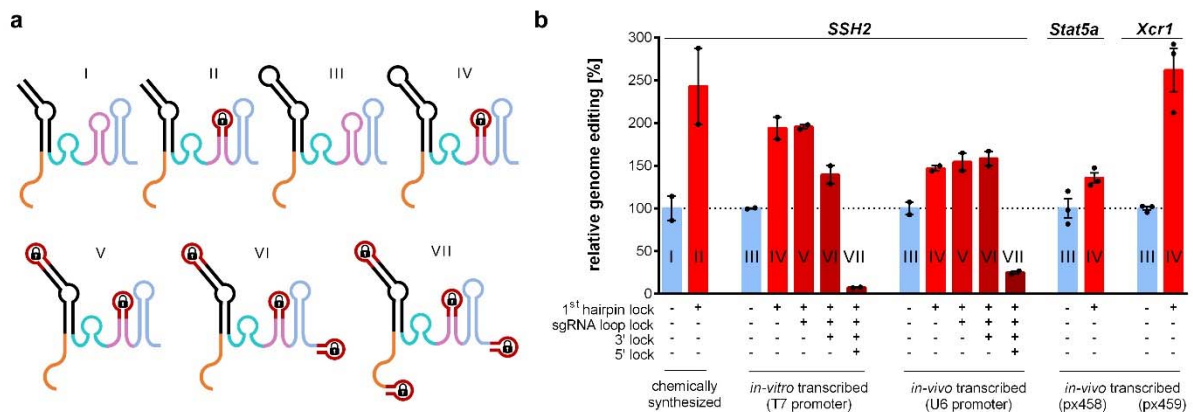

**Supplementary Figure 1: Genome editing efficiencies of gRNAs carrying locked hairpins at different positions.** (a) Design sketches of the gRNAs used in A labelled with roman numerals. Highlighted are the position of the locked hairpin (dark red), spacer sequence (orange), nexus (cyan), 1<sup>st</sup> hairpin (pink), and 2<sup>nd</sup> hairpin (blue). (b) Relative genome editing efficiencies of chemically synthesized, *in vitro* transcribed, and *in vivo* transcribed gRNAs that carry locked hairpins at different positions. Independent biological replicates ( $n = 2$  for *SSH2*,  $n = 3$  for *Stat5a* and *Xcr1*) are depicted by black dots and the error bars show the SEM. Oligonucleotides were electroporated into 409-B2 iCRISPR hiPSCs for *SSH2* or into SNL 76/7 mouse embryonic fibroblasts for *Stat5a* and *Xcr1*. For the plasmids px458 (Cas9-2A-GFP) and px459 (Cas9-2A-Puro) Cas9 is expressed by a CBh promoter while the gRNA is expressed from a U6 promoter. Cells electroporated with px459 were treated with 2  $\mu$ g/ml puromycin for two days starting one day post electroporation. Source data are provided as a Source Data file.

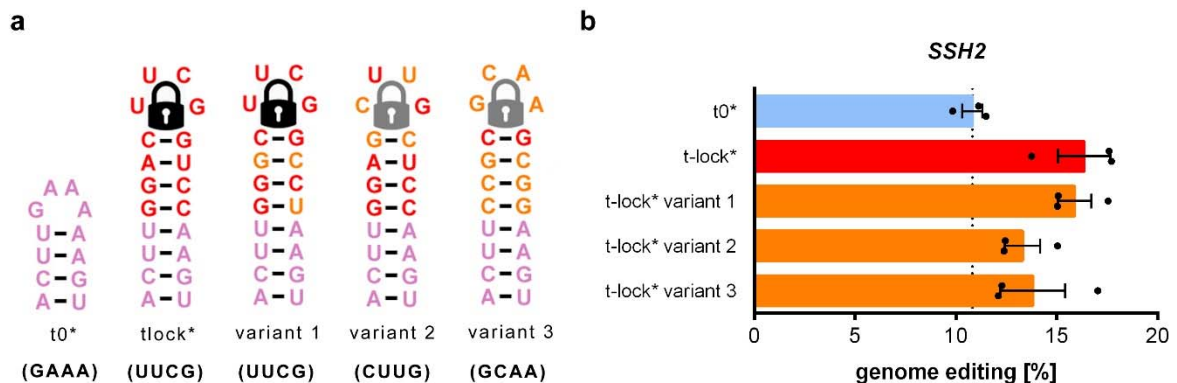

**Supplementary Figure 2: Genome editing efficiencies of gRNAs with different locked hairpin variants.** (a) 1<sup>st</sup> hairpin sequences of the normal tracrRNA (t0), locked tracrRNA (t-lock), and three different locked tracrRNA variants are shown. The elongated locked hairpin is colored red and nucleotide changes in the variants with superstable loops (UUCG, CUUG, GCAA) are orange. (b) Genome editing efficiencies of the crRNA:tracrRNA hybrid gRNAs for the *SSH2* target. Independent biological replicates are depicted by black dots ( $n = 3$ ) and the error bars show the SEM. The chemically synthesized tracrRNAs additionally have two phosphorothioate bonds at both the 3' and 5' terminus (\*) to allow reasonable protection against degradation by nucleases. Oligonucleotides were electroporated into 409-B2 iCRISPR hiPSCs. Source data are provided as a Source Data file.

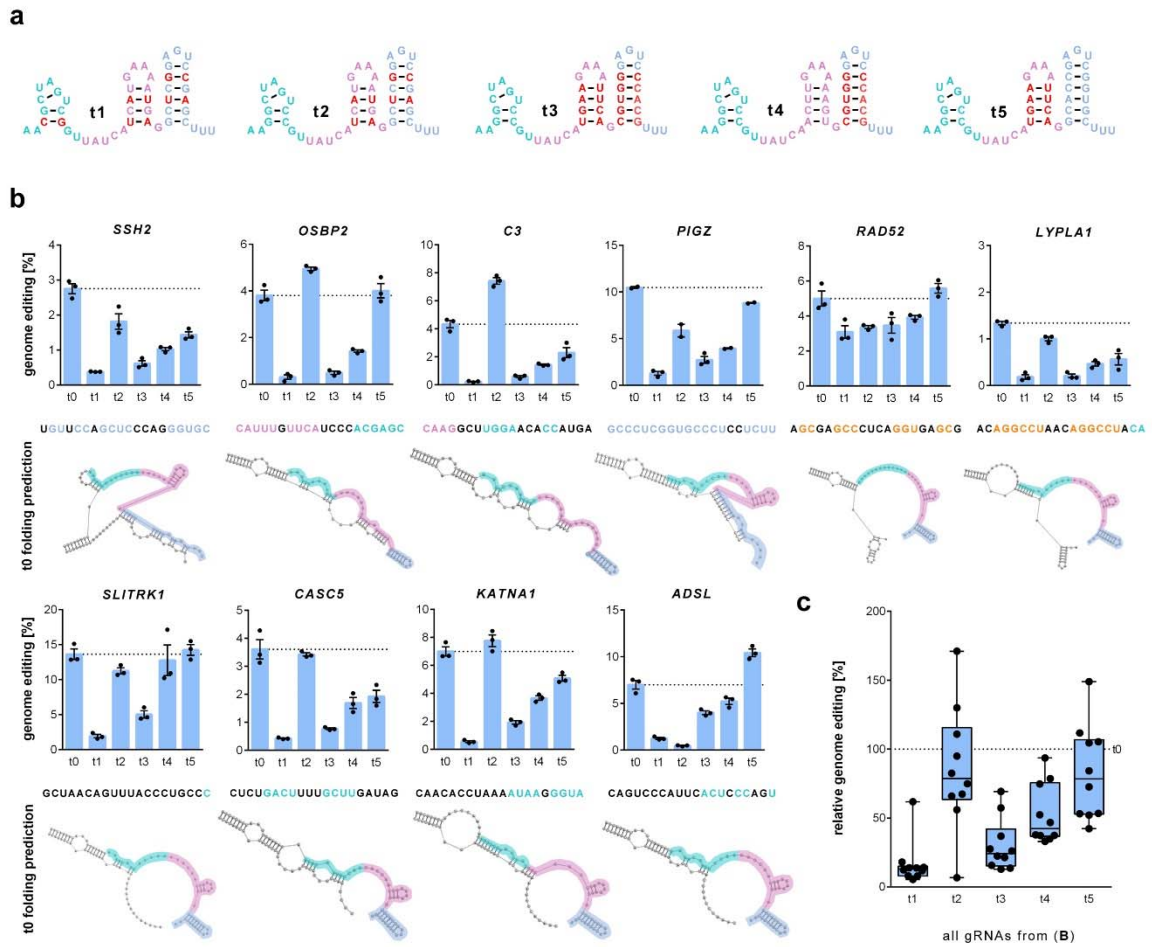

**Supplementary Figure 3: Genome editing efficiencies of gRNAs with swaps of opposing bases. (a)** The nexus, 1<sup>st</sup> hairpin and 2<sup>nd</sup> hairpin of the different base swap modifications (t1 to t5) are shown. The respective base swaps are colored red. **(b)** Genome editing efficiencies for t0 (normal) and the different swap designs t1 to t5. Independent biological replicates are depicted by black dots ( $n = 3$ , except *PIGZ* t0, t2, t4, t5  $n = 2$ ) and the error bars show the SEM. The panels show the efficiencies for 10 different gRNAs with different predicted non-canonical gRNA interactions to the nexus (cyan), 1<sup>st</sup> hairpin (pink), 2<sup>nd</sup> hairpin (blue), and/or the spacer sequence itself (orange). The predicted crRNA:tracrRNA structure from the *Bellaousov et al.*<sup>1</sup> RNAstructure web server is shown below the spacer sequence. **(c)** Box plots of relative genome editing efficiencies for all gRNAs from b ( $n = 10$ ) with respect to the corresponding t0 tracrRNA set to 100% are shown. Boxes extend from the 25th to 75th percentile and show the median as a line. Whiskers extend from the minimum to maximum value. Chemically synthesized gRNAs (hybridized crRNA:tracrRNA) were lipofected into Cas9 expressing 409-B2 iCRISPR human induced pluripotent stem cells (hiPSCs). Source data are provided as a Source Data file.

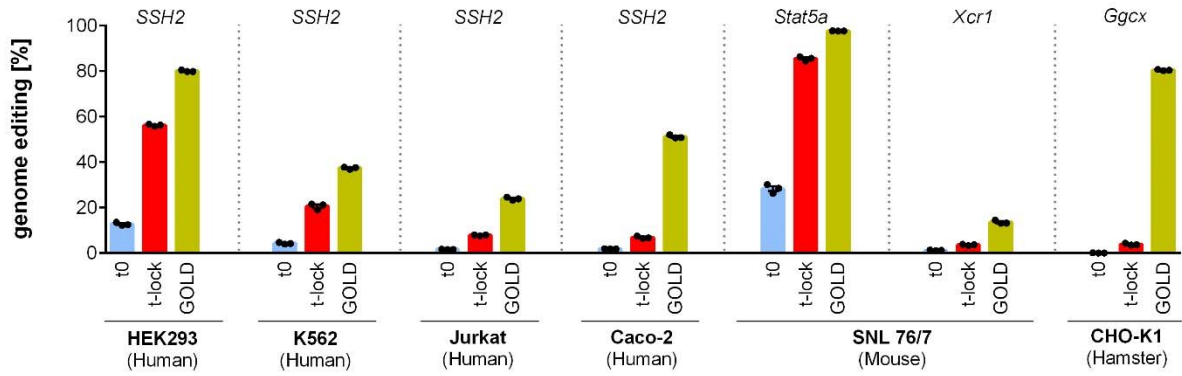

**Supplementary Figure 4: Genome editing efficiencies of gRNAs with modified backbones in non-pluripotent cell types.** Genome editing efficiency of normal tracrRNA (blue), t-lock tracrRNA (red), and GOLD tracrRNA (gold) hybridized with different crRNAs after electroporation of Cas9 RNP into different cell lines derived from human, mouse, and chinese hamster: human embryonic kidney 293 cells (HEK293), human myelogenous leukemia cells (K562), human T lymphocyte cells (Jurkat), human colorectal adenocarcinoma cells (Caco-2), mouse embryonic fibroblast derived cells (SNL 76/7), chinese hamster ovary cells (CHO-K1). Independent biological replicates are depicted by black dots ( $n = 3$ ) and the error bars show the SEM. Source data are provided as a Source Data file.

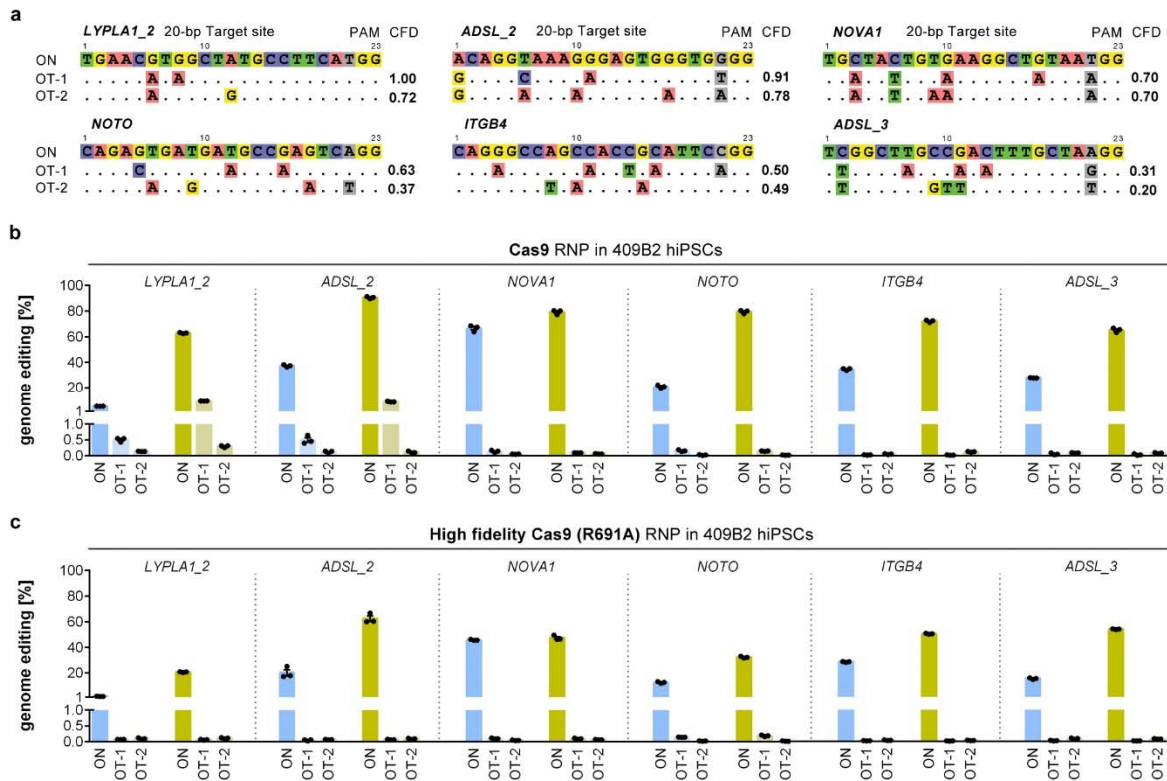

**Supplementary Figure 5: Impact of optimized gRNA backbones on off-target editing.** (a) On-target site sequence (ON) and top two CFD-score<sup>2,3</sup> predicted off-target site sequences (OT-1, OT-2) of six different gRNA spacers that have varying predicted tendency to generate off-targets. Non-mismatched bases are visualized by a dot. The CFD off-target scores are stated (ranging from 0 to 1; 1 = maximum off-target editing probability). (b) Genome editing efficiency of on-target and off-target sites for gRNAs from A when the normal (t0, in blue) or GOLD (in gold) tracrRNA are used for editing with Cas9. (c) Genome editing efficiency of on-target and off-target sites for gRNAs from A when the normal (t0) or GOLD tracrRNA are used for editing with the high fidelity Cas9 R691A variant (Cas9 HiFi). Cas9 RNPs were electroporated into 409-B2 hiPSCs. Independent biological replicates are depicted by black dots ( $n = 3$ ) and the error bars show the SEM. Source data are provided as a Source Data file.

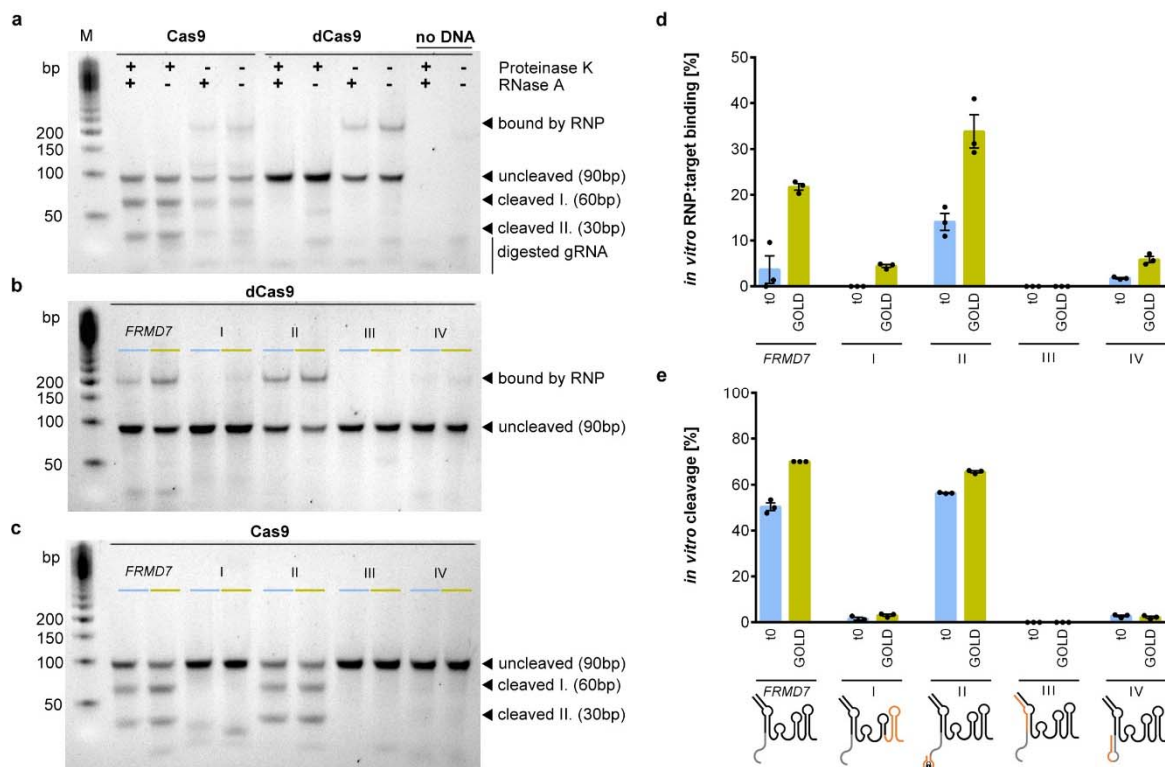

**Supplementary Fig. 6: Impact of optimized gRNA backbones on *in vitro* binding and cleavage.** (a) Exemplary 4% agarose gel of *FRMD7* crRNA:GOLD-tracrRNA incubated with 90bp dsDNA, that contains the target site and adjacent genomic sequence, and Cas9 or dead (d)Cas9 for 16h at 37°C. Columns show different subsequent treatments with Proteinase K and/or RNase and include no DNA controls. Blue light excitation of SYBR Gold II bound to double-stranded oligonucleotides results in visualization of separated bands corresponding to DNA bound by RNP, unbound and uncleaved DNA (90bp), as well as cleaved DNA (60bp and 30bp). Partially double-stranded gRNA can also result in faint bands. (b) Exemplary gel of dCas9 incubated with *FRMD7* and ‘worst-case’ crRNAs (I to IV) hybridized to either normal tracrRNA t0 (blue) or GOLD-tracrRNA (gold) and respective target DNA. Samples were not treated with Proteinase K or RNase A. (c) Exemplary gel of Cas9 incubated with *FRMD7* and ‘worst-case’ crRNAs (I to IV) hybridized to either normal tracrRNA t0 (blue) or GOLD-tracrRNA (gold) and respective target DNA. Samples were treated with both Proteinase K and RNase A. (d) High sensitivity DNA chip quantification of *in vitro* RNP:target binding of samples treated identically to those shown in b. (e) High sensitivity DNA chip quantification of *in vitro* cleavage of samples treated identically to those shown in c. Replicates from independent experiments are depicted by black dots (n = 3) and error bars show the SEM. Source data are provided as a Source Data file.

### Supplementary information references

- 1 Bellaousov, S., Reuter, J. S., Seetin, M. G. & Mathews, D. H. RNAstructure: Web servers for RNA secondary structure prediction and analysis. *Nucleic Acids Res* **41**, W471-474, doi:10.1093/nar/gkt290 (2013).
- 2 Doench, J. G. *et al.* Optimized sgRNA design to maximize activity and minimize off-target effects of CRISPR-Cas9. *Nat Biotechnol* **34**, 184-191, doi:10.1038/nbt.3437 (2016).
- 3 Haeussler, M. *et al.* Evaluation of off-target and on-target scoring algorithms and integration into the guide RNA selection tool CRISPOR. *Genome Biol* **17**, 148, doi:10.1186/s13059-016-1012-2 (2016).
