# Supplementary material for: Improved gRNA secondary structures allow editing of target sites resistant to CRISPR-Cas9 cleavage
Source: PubMed Central journal article supplement (PMC8789806; doi:10.1038/s41467-022-28137-7), 2022-01-25
Supplement: 41467_2022_28137_MOESM4_ESM.pdf [file 41467_2022_28137_MOESM4_ESM.pdf]

**Title: Supplementary Data 1:**

**Description: Oligonucleotides used in this study.** Both RNA oligonucleotides (tracrRNA and crRNA spacer sequence) as well as DNA oligonucleotides (primer, other ssDNA and dsDNA) are shown. Chemical modifications used are: \*=phosphorothioate bond, mN=2'OMe.
